# Supplementary material for: Optimized trimetallic selenide heterostructures as high-performance trifunctional electrodes for self-sustained hydrogen production
Source: Royal Society of Chemistry journal article supplement (doi:10.1039/d4ta06540a), 2025-01-01
Supplement: d4ta06540a1.pdf [file d4ta06540a1.pdf]

# Supporting Information

## Optimized trimetallic selenides heterostructures as high-performance trifunctional electrodes for self-sustained hydrogen production

Muhammad Mushtaq,<sup>a</sup> Malcolm Koroma,<sup>b</sup> Shu Jiang,<sup>a</sup> Selvam Mathi,<sup>a</sup> Meilian Tu,<sup>a</sup> Zeba Khanam,<sup>a</sup> Yu-wen Hu,<sup>\*a</sup> Jianqiu Deng,<sup>\*c</sup> and M.-Sadeeq Balogun<sup>\*ac</sup>

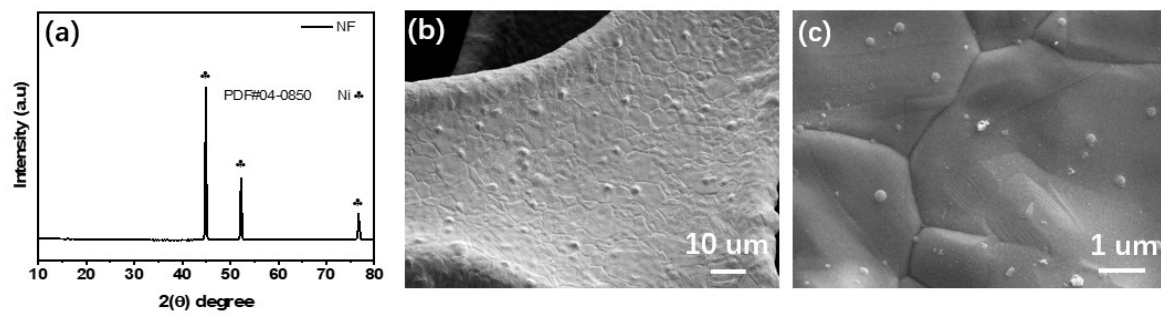

**Figure S1.** (a) XRD and (b-c) SEM images of pristine NF.

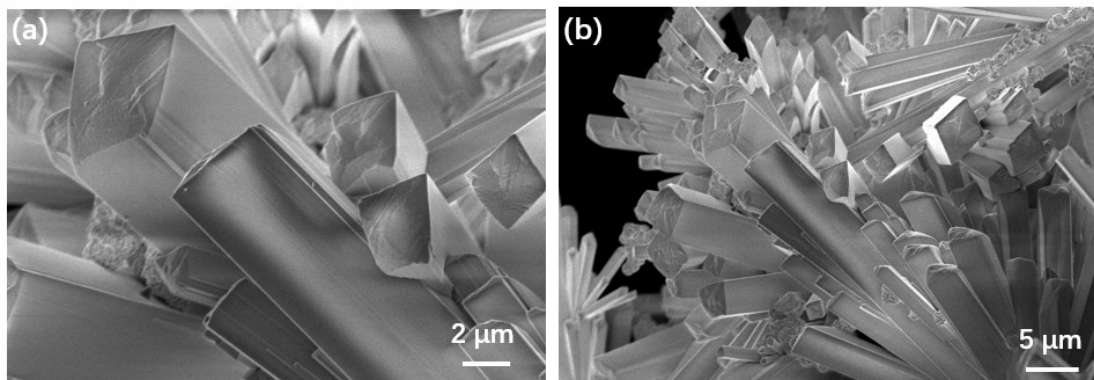

**Figure S2.** (a-b) SEM images of Co<sub>x</sub>Mo<sub>y</sub> precursors.

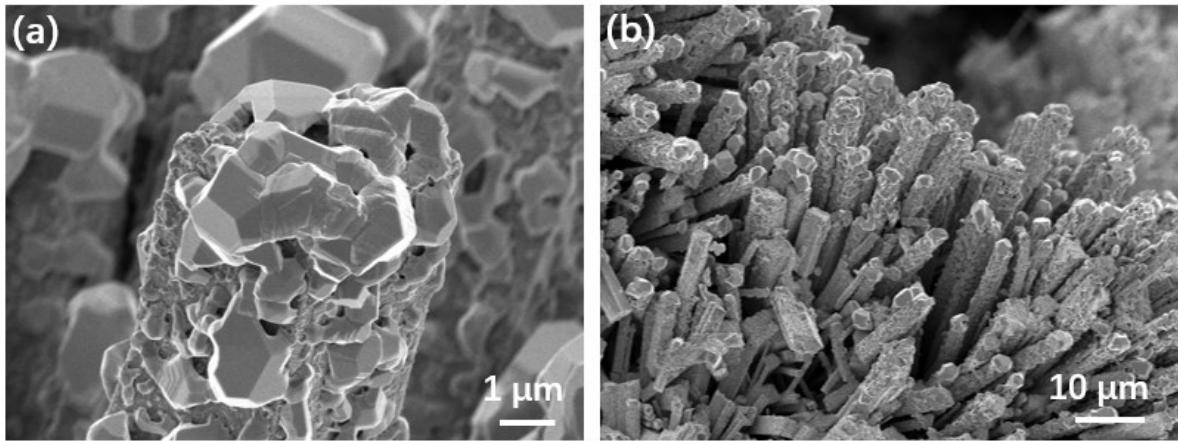

**Figure S3.** (a-b) SEM images of N-NCM-Se.

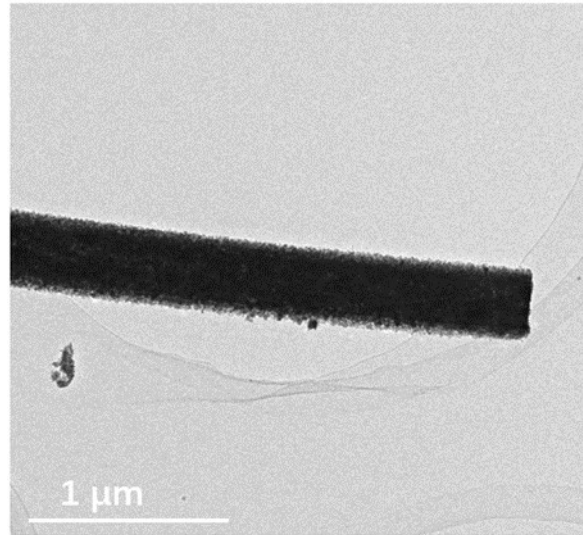

**Figure S4.** TEM image of N-NCM-Se with selenium particles anchored on the surface.

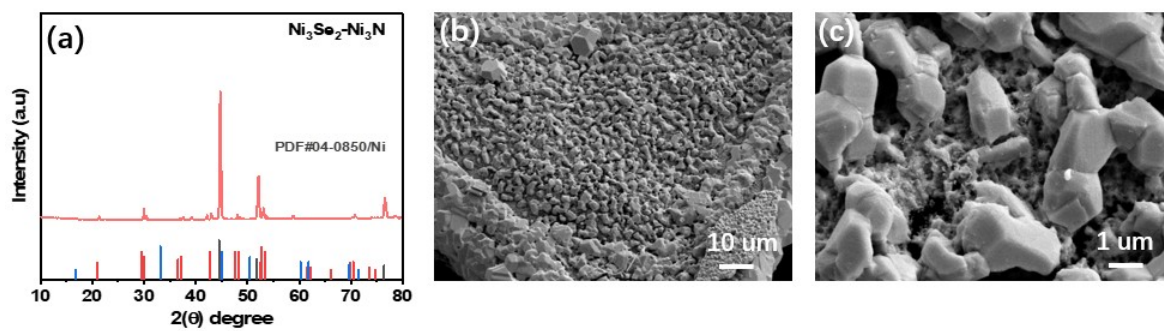

**Figure S5.** (a) XRD spectrum (b-c) SEM images of Ni<sub>3</sub>Se<sub>2</sub>-Ni<sub>3</sub>N.

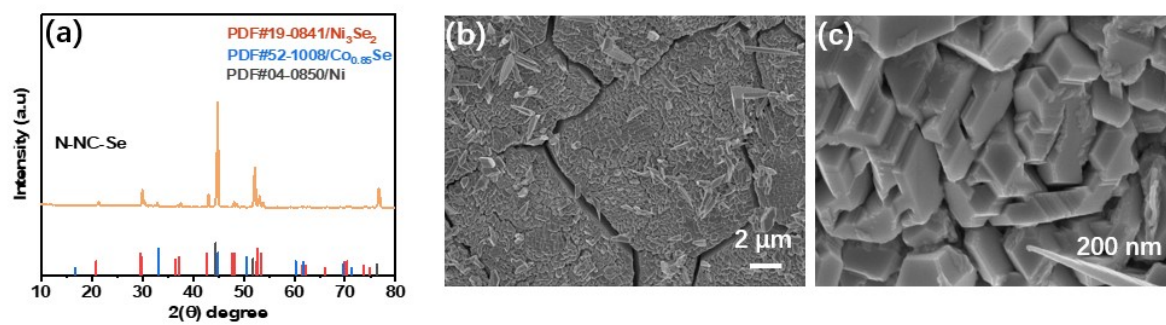

**Figure S6.** (a) XRD spectrum (b-c) SEM images of N-NC-Se.

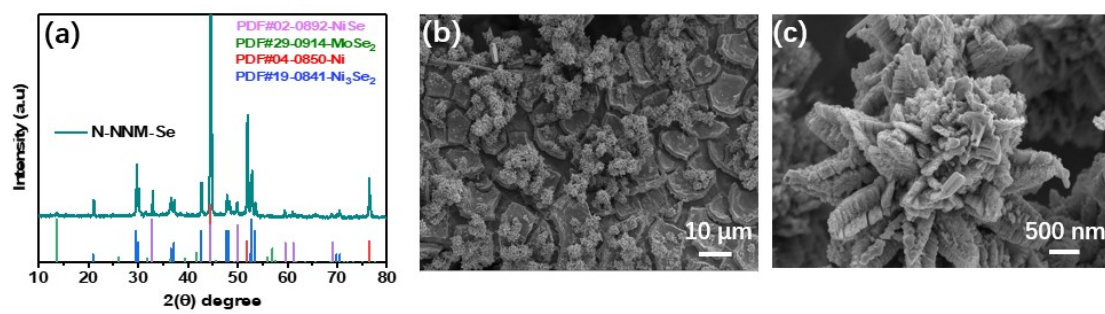

**Figure S7.** (a) XRD spectrum (b-c) SEM images of N-NNM-Se.



**Table S1.** HER performance comparison of N-NCM-Se with previous reports on selenides-based electrocatalysts.

| S/No. | Electrode                                                      | Overpotential (mV)<br>@10 mA cm <sup>-2</sup> | Tafel slope (mV dec <sup>-1</sup> ) | References                                     |
|-------|----------------------------------------------------------------|-----------------------------------------------|-------------------------------------|------------------------------------------------|
| 1     | N-NCM-Se                                                       | 14.4 mV                                       | 66.38                               | Our work                                       |
| 2     | Co <sub>0.13</sub> Ni <sub>0.87</sub> Se <sub>2</sub> /Ti      | 64mV                                          | 107                                 | Nanoscale, 2016, 8, 3911–3915                  |
| 3     | CoNiSe/NC-3                                                    | 100 mV                                        | 66.5                                | J. Energy Chem, 34 (2019) 161-170              |
| 4     | Co <sub>0.75</sub> Ni <sub>0.25</sub> Se/NF                    | 106mV                                         | 74                                  | Nanoscale, 2019, 11, 7959–7966                 |
| 5     | CoSe <sub>2</sub> @NiSe <sub>2</sub>                           | 162 mV                                        | 43.24                               | Int. J. Hydrog. Energy, 45 (2020) 30611-30621  |
| 6     | NiSe <sub>2</sub>                                              | 143mV                                         | 49                                  | Nano Energy, (2016) 20, 29–36                  |
| 7     | NiSe/NF                                                        | 96mV                                          | 120                                 | Angew. Chem. Int. Ed, 2015, 54, 9351-9355      |
| 8     | NiSe/CoSe <sub>2</sub>                                         | 117mV                                         | 257.4                               | J. Alloys Compd 976 (2024) 173092              |
| 9     | MoSe <sub>2</sub> –NiSe <sub>2</sub> –CoSe <sub>2</sub> / PNCf | 38 mV                                         | 38                                  | Nano Energy, 71 (2020) 104637                  |
| 10    | NiSe <sub>2</sub> /MoSe <sub>2</sub> @N-BCCSs                  | 119mV                                         | 89                                  | Adv. Funct. Mater, 2024, 34, 2314226           |
| 11    | Mo <sub>0.6</sub> doped NiSe <sub>2</sub>                      | 172                                           | 115                                 | Electrochim Acta, 475 (2024) 143683            |
| 12    | 5% Mo/SeNiSe <sub>2</sub>                                      | 89mV                                          | 57                                  | Int. J. Hydrog. Energy 49 (2024) 25-36         |
| 13    | Mo <sub>3</sub> Se <sub>4</sub> -NiSe                          | 84.4mV                                        | 59.62                               | Adv. Mater, 2024, 36, 2305813                  |
| 14    | VSe-CoSe <sub>2</sub> /MoSe <sub>2</sub>                       | 74mV                                          | 52.4                                | J. Colloid. Interface Sc, 654 (2024) 1040-1053 |
| 15    | Ni-MoSe <sub>x</sub> @CoSe <sub>2</sub> CSNs                   | 37mV                                          | 68                                  | J. Chem. Eng, 383 (2020) 123129                |

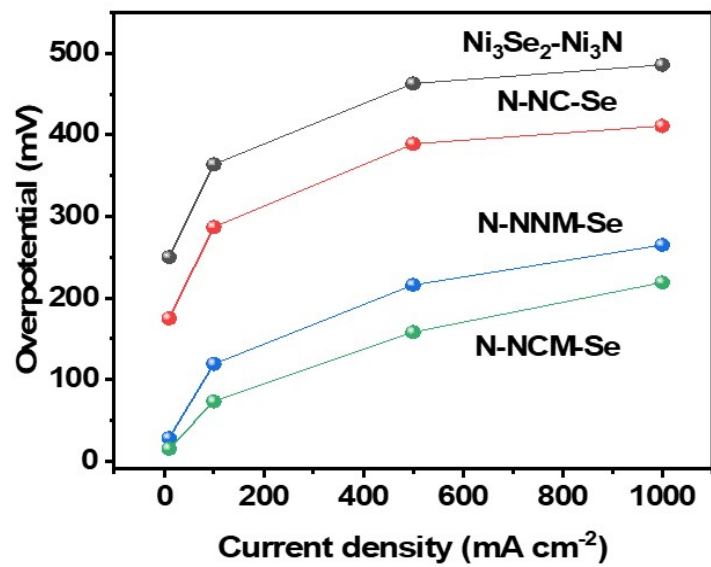

**Figure S8.** HER overpotential for the as-prepared electrocatalysts at varying current densities.

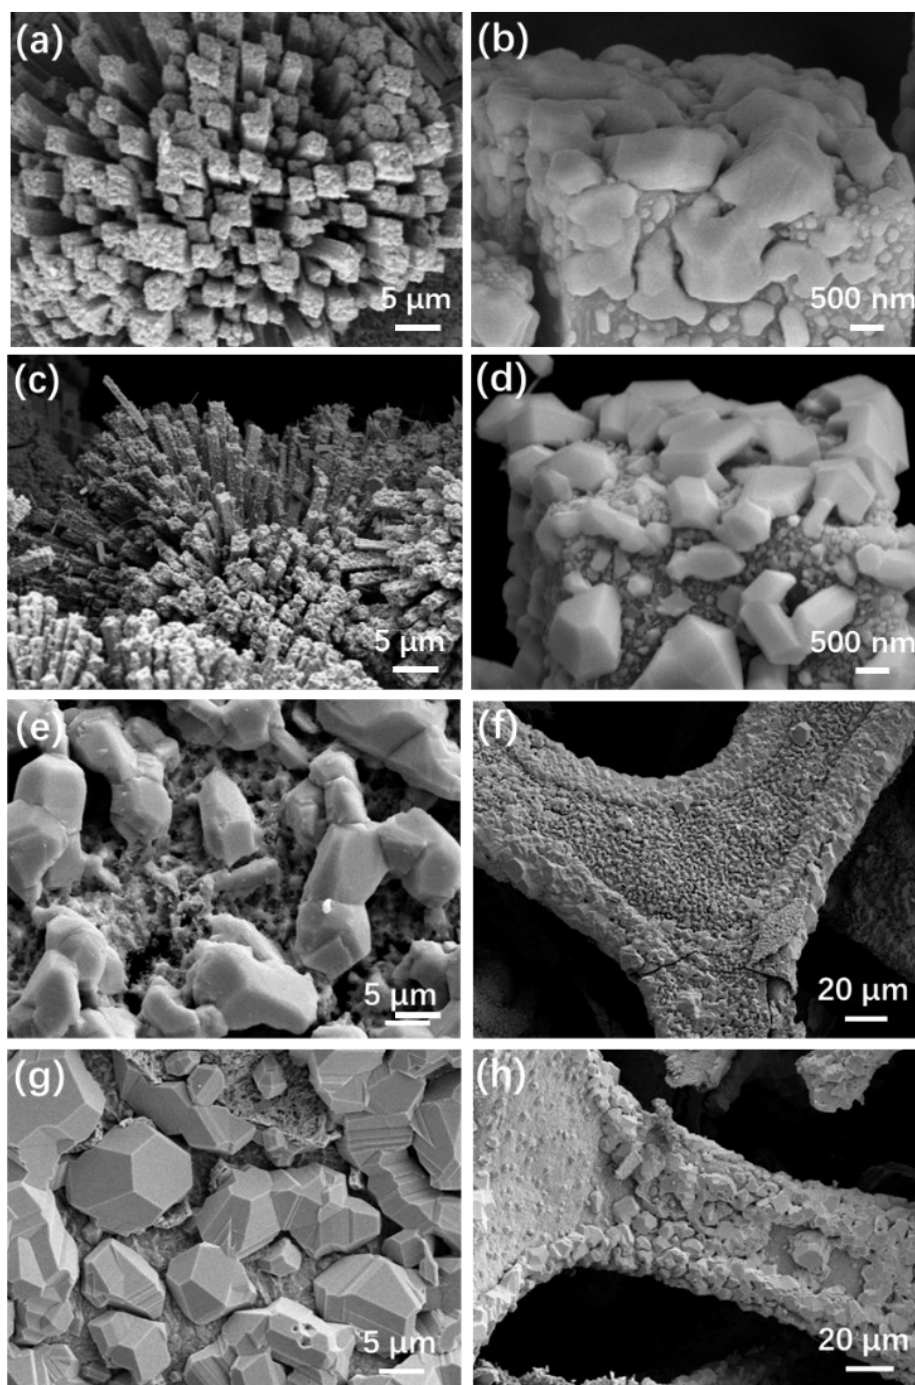

**Figure S9.** SEM images of (a-b) N-NCM-Se/100 and (c-d) N-NCM-Se/300 derived from selenization of the  $\text{Co}_x\text{Mo}_y$  precursors. SEM images of (e-f)  $\text{Ni}_3\text{Se}_2$ - $\text{Ni}_3\text{N}$ /100 and (g-h)  $\text{Ni}_3\text{Se}_2$ - $\text{Ni}_3\text{N}$ /300 electrodes derived from direct selenization of the pristine NF.

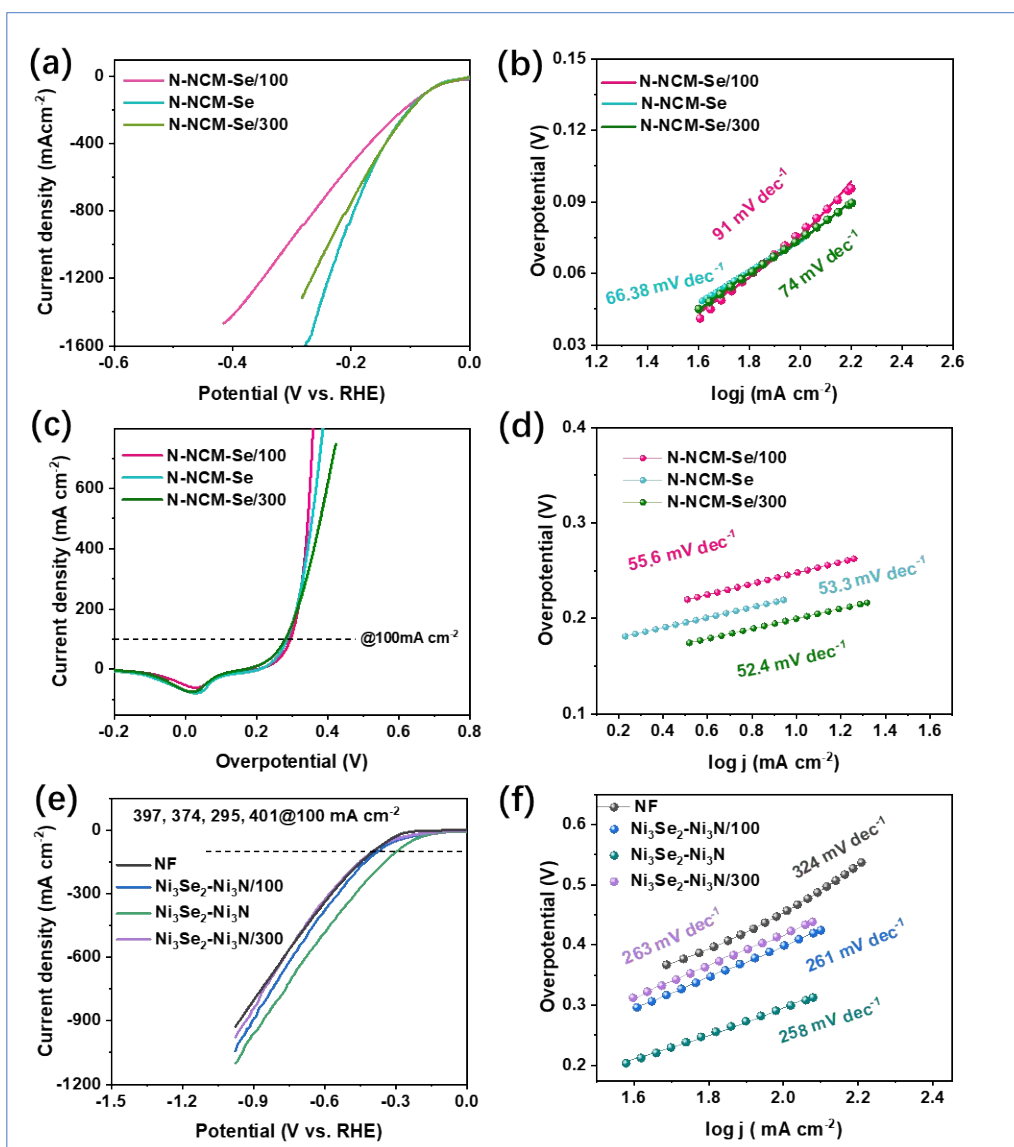

**Figure S10.** (a) HER LSV curves, (b) HER Tafel slopes, (c) OER LSV curves, and (d) OER Tafel slopes of the N-NCM-Se electrodes with different selenium concentration. (e) HER LSV curves and (f) HER Tafel slopes of Ni<sub>3</sub>Se<sub>2</sub>-Ni<sub>3</sub>N electrodes with different selenium concentration.

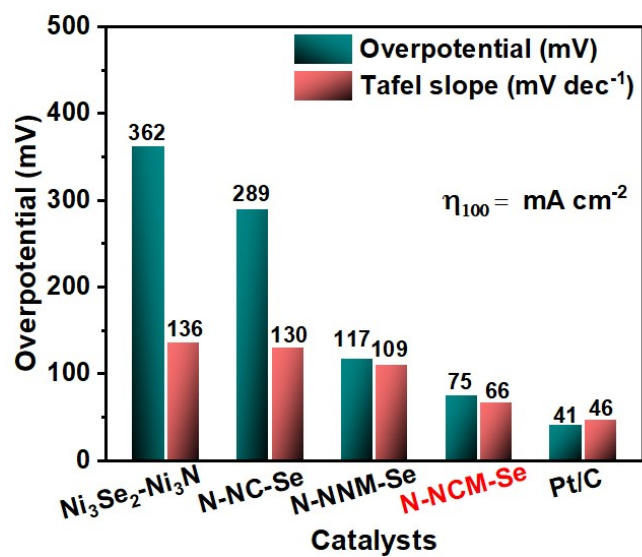

**Figure S11.** Comparison bar graph of the overpotential and Tafel slopes of our prepared N-NCM-Se with other control samples.

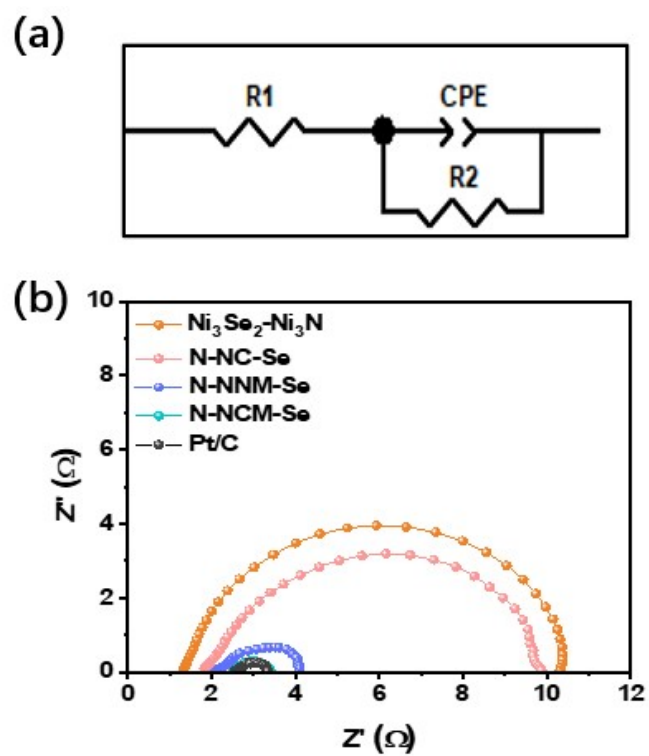

**Figure S12.** (a) EIS fitted circuit diagram of (a) N-NCM-Se. (b) Nyquist plots of the different electrodes.

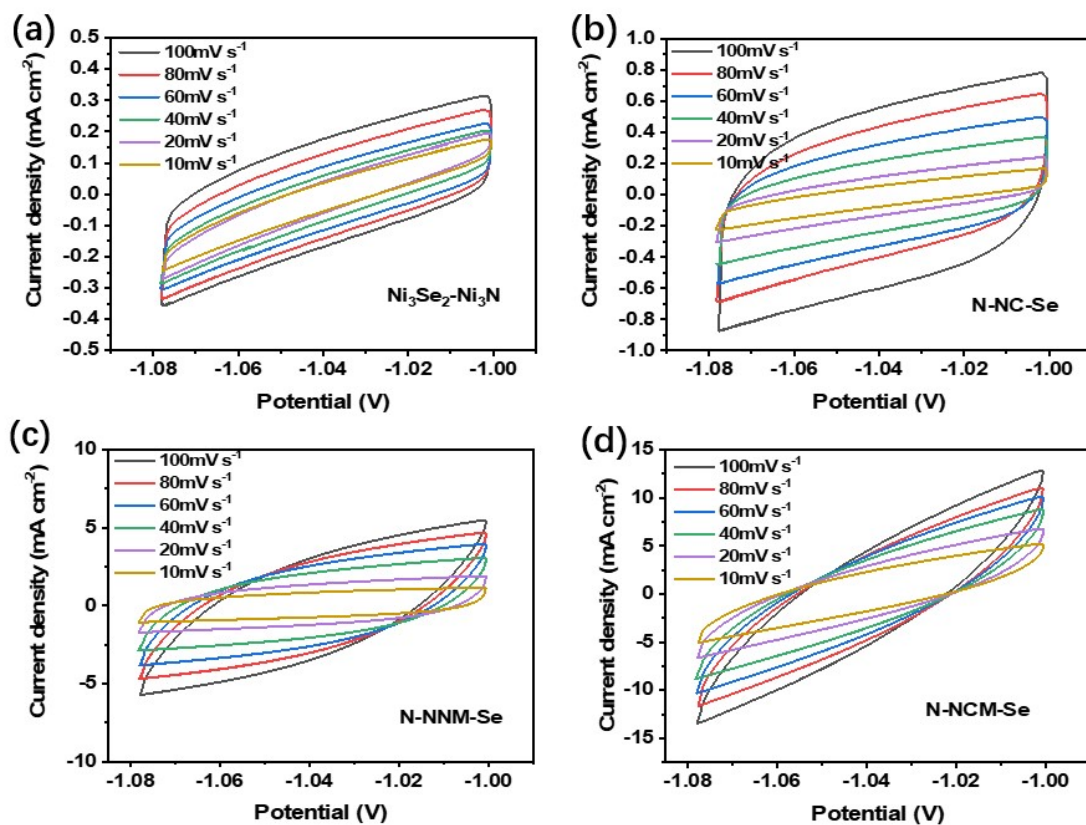

**Figure S13.** CV curves of (a)  $\text{Ni}_3\text{Se}_2\text{-Ni}_3\text{N}$ , (b)  $\text{N-NC-Se}$ , (c)  $\text{N-NNM-Se}$ , and (d)  $\text{N-NCM-Se}$  at different scan rates at the non-faradic region for HER.

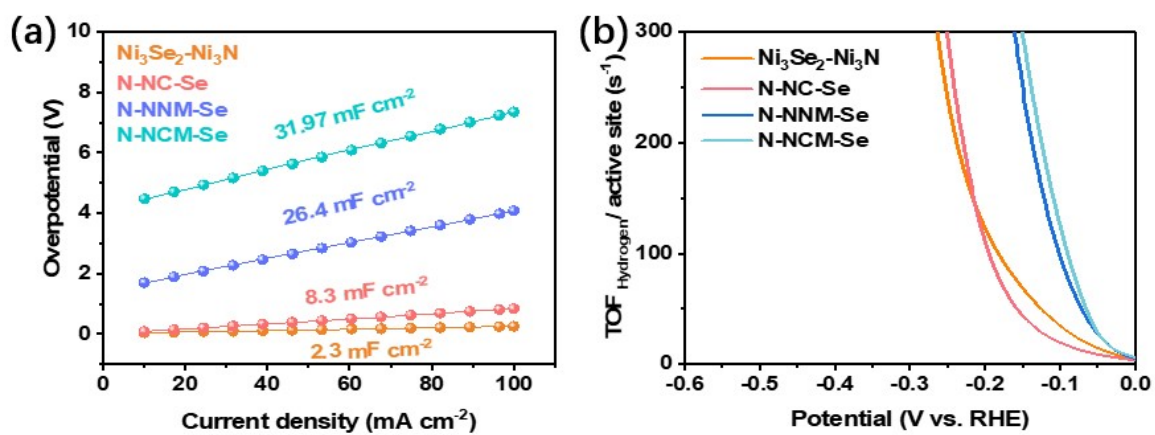

**Figure S14.** (a) HER  $C_{dl}$  values derived from the CV curves in Figure S13, and (b) normalized LSV curves after TOF calculation.



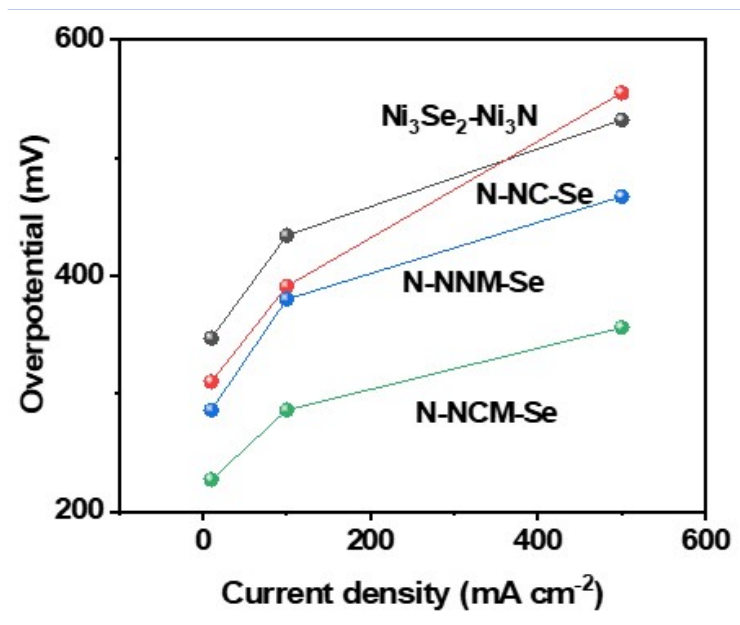

Figure S15. OER overpotentials for the as-prepared electrodes at different current densities.

**Table S2.** OER performance comparison of N-NCM-Se with previous reports on selenides-based electrocatalysts.

| Electrode                                                                               | Overpotential (mV)<br>@10 mA cm <sup>-2</sup> | Tafel slope (mV<br>dec <sup>-1</sup> ) | References                                  |
|-----------------------------------------------------------------------------------------|-----------------------------------------------|----------------------------------------|---------------------------------------------|
| <b>N-NCM-Se</b>                                                                         | <b>226 mV</b>                                 | <b>53.33</b>                           | <b>Our work</b>                             |
| NiSe <sub>2</sub> /CoSe <sub>2</sub>                                                    | 226mV                                         | 53                                     | Adv. Mater. 2020, 32, 2000607               |
| CoSe <sub>2</sub> @pMF-R                                                                | 378 mV                                        | 81.1                                   | Int. J. Hydrog. Energy, 49 (2024) 995-1004  |
| Ni <sub>0.27</sub> Co <sub>0.28</sub> Fe <sub>0.30</sub> Se@CNT                         | 240mV                                         | 44                                     | J. Mater. Chem. A, 2021, 9, 24261-24267     |
| Co <sub>0.21</sub> Ni <sub>0.25</sub> Cu <sub>0.54</sub> ) <sub>3</sub> Se <sub>2</sub> | 272 mV                                        | 54                                     | J. Mater. Chem. A, 2019, 7, 9877-9889       |
| Fe <sub>0.48</sub> Co <sub>0.38</sub> Cu <sub>0.14</sub> )Se                            | 256mV                                         | 40.8                                   | ACS Sustain. Chem. Eng. 2019, 7, 9588-9600  |
| Cu <sub>2</sub> Se                                                                      | 270mV                                         | 48                                     | ACS Appl. Energy Mater. 2018, 1, 4075-4083  |
| MnSe <sub>2</sub> @3 wt%                                                                | 270mV                                         | 160                                    | Appl. Surf. Sci, 605 (2022) 154804          |
| CoMn)Se <sub>2</sub>                                                                    | 274 mV                                        | 39                                     | Appl. Catal. B: Environ. 236 (2018) 569-575 |
| Ni <sub>3</sub> Se <sub>2</sub>                                                         | 290mV                                         | 89                                     | Energy Environ. Sci, 2016, 9, 1771-1782     |
| Zn <sub>0.1</sub> Co <sub>0.9</sub> Se <sub>2</sub>                                     | 340mV                                         | 43.2                                   | Electrochim Acta 349 (2020) 136336          |
| MnSe@MWCNT                                                                              | 290mV                                         | 54                                     | J. Mater. Chem. A, 2022, 10, 6772-678       |

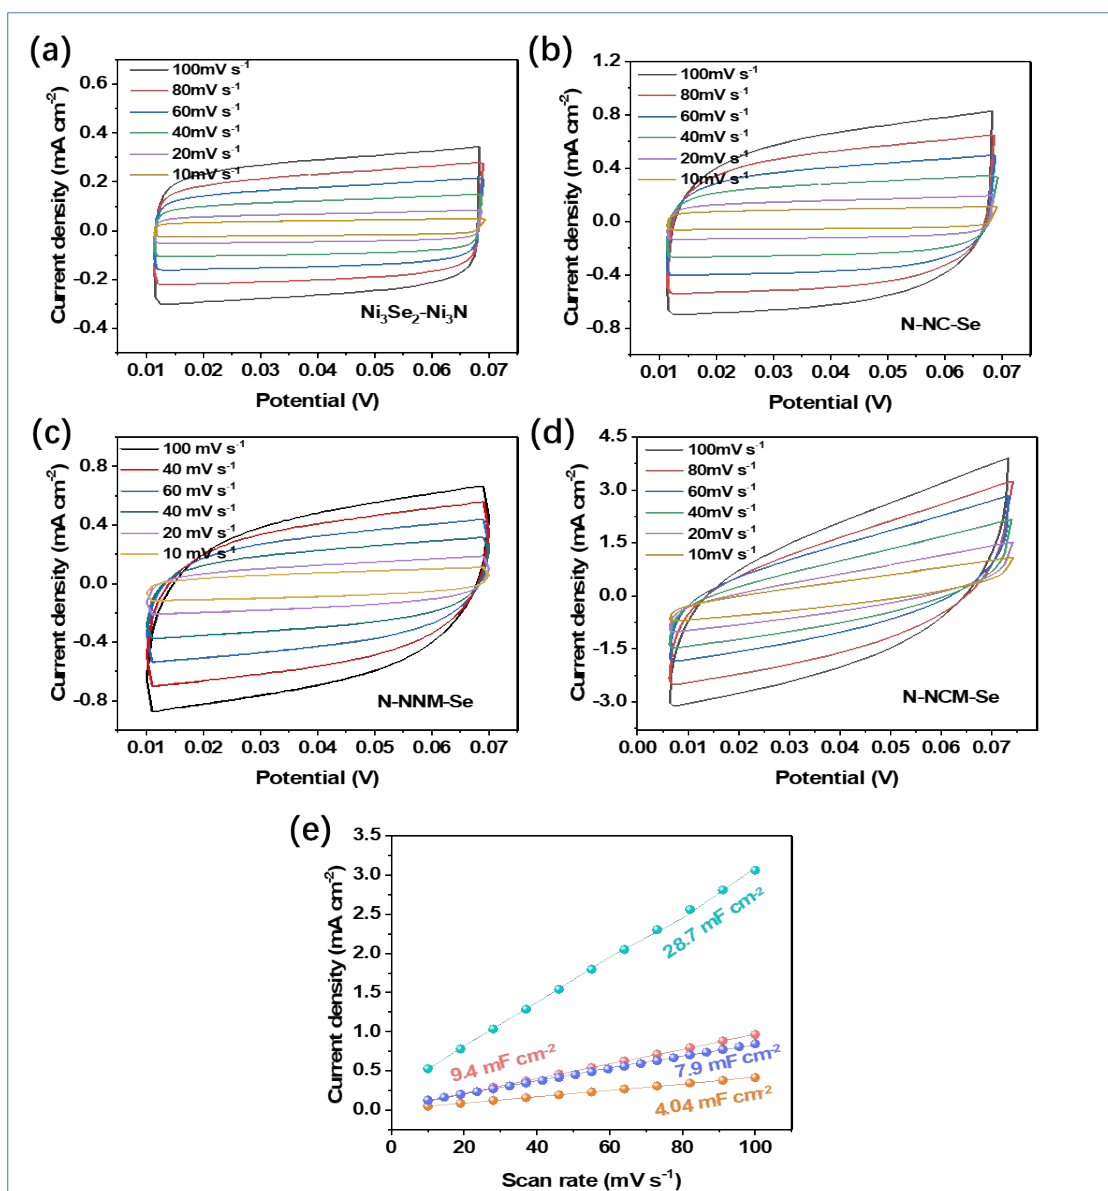

**Figure S16.** CV curves of (a)  $Ni_3Se_2-Ni_3N$ , (b) N-NC-Se, (c) N-NNM-Se, and (d) N-NCM-Se at different scan rates at the non-faradic region for OER. (e) The Corresponding  $C_{dl}$  values for different samples.

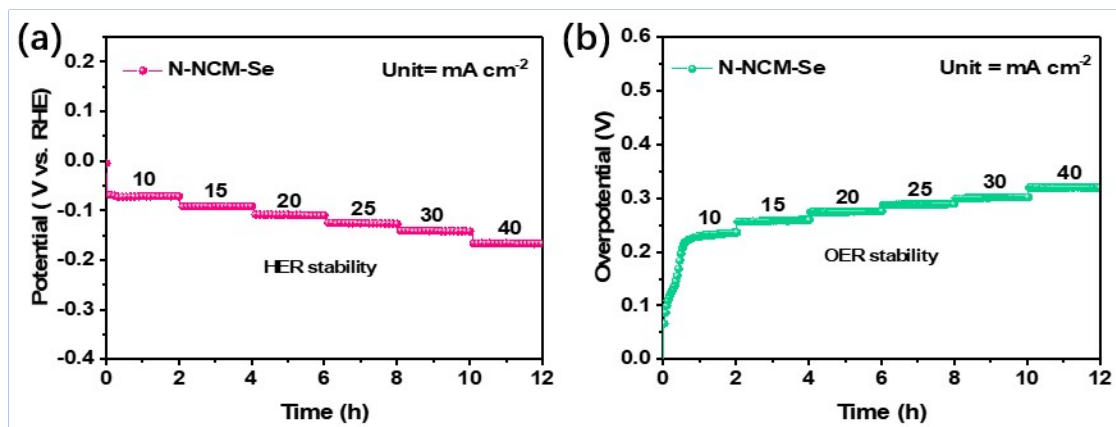

Figure S17. (a) HER and (b) OER stabilities of N-NCM-Se at different current densities.

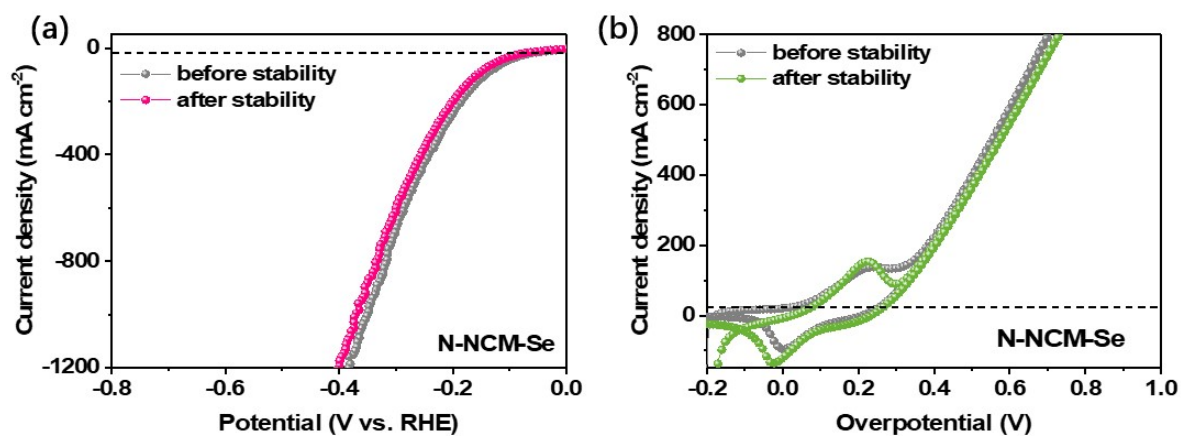

**Figure S18.** (a) HER LSV curves and (b) OER CV curves of N-NCM-Se before and after 60 h long term stability test.

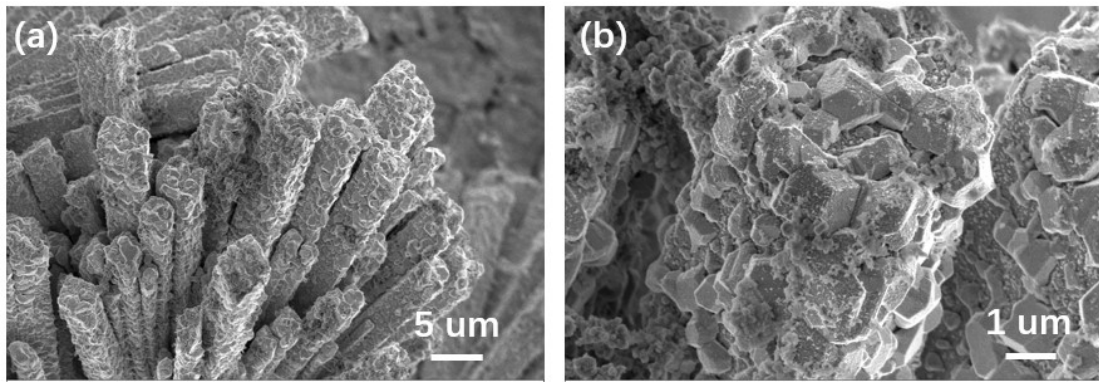

**Figure S19.** SEM images of N-NCM-Se after 60 h HER stability test.

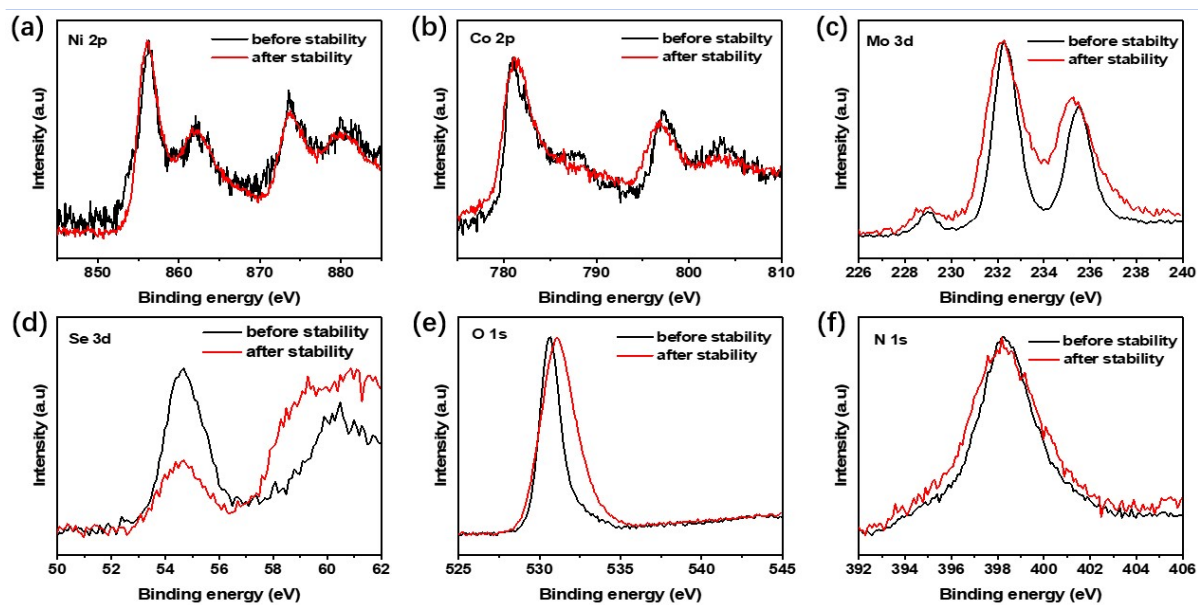

**Figure S20.** (a) Ni 2p, (b) Co 2p, (c) Mo 3d, (d) Se 3d, (e) O 1s, and (f) N 1s XPS spectra of N-NCM-Se before and after 60 h HER stability test.

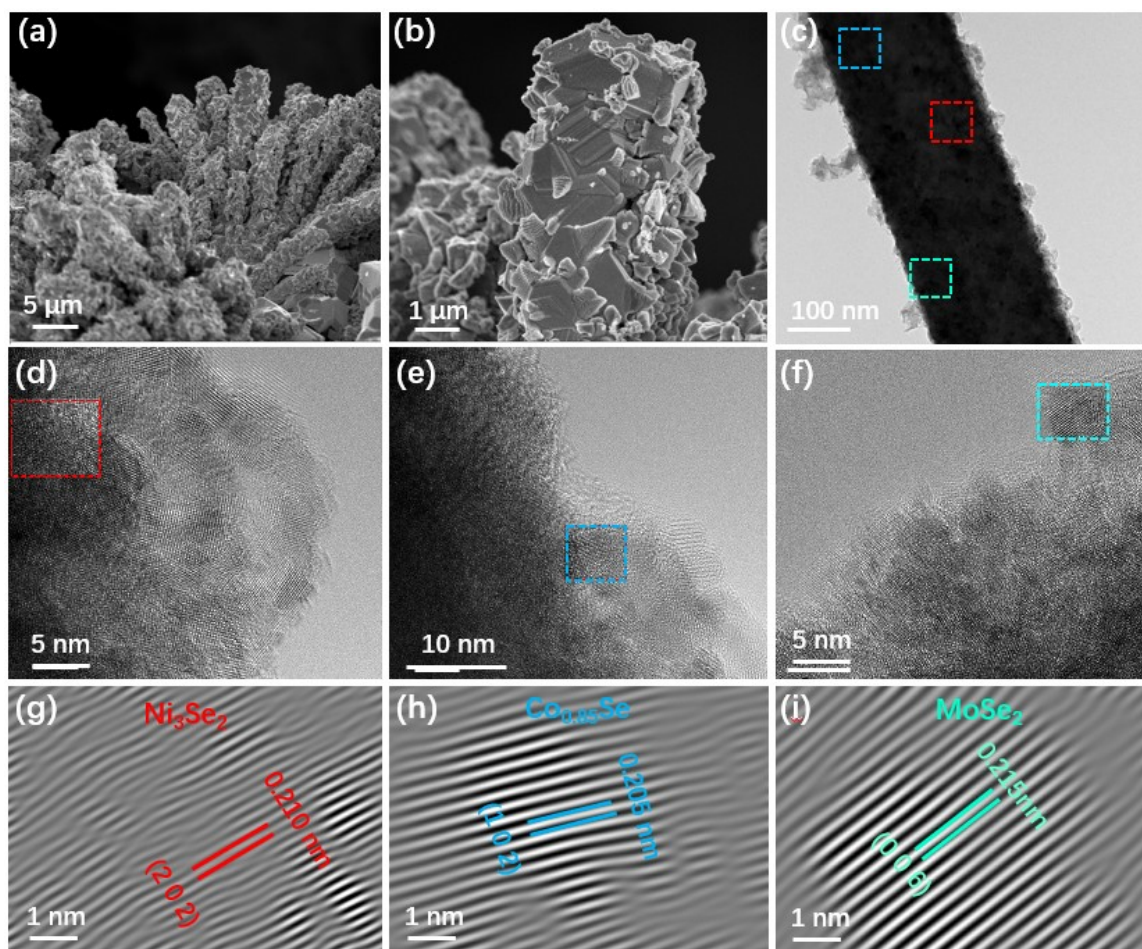

**Figure S21.** Structural stability of N-NCM-Se after 60 h OER stability. (a-b) SEM and (c) TEM images of N-NCM-Se. (d-f) HRTEM images for different constituents of the composite and (g-i) the corresponding lattice fringes.



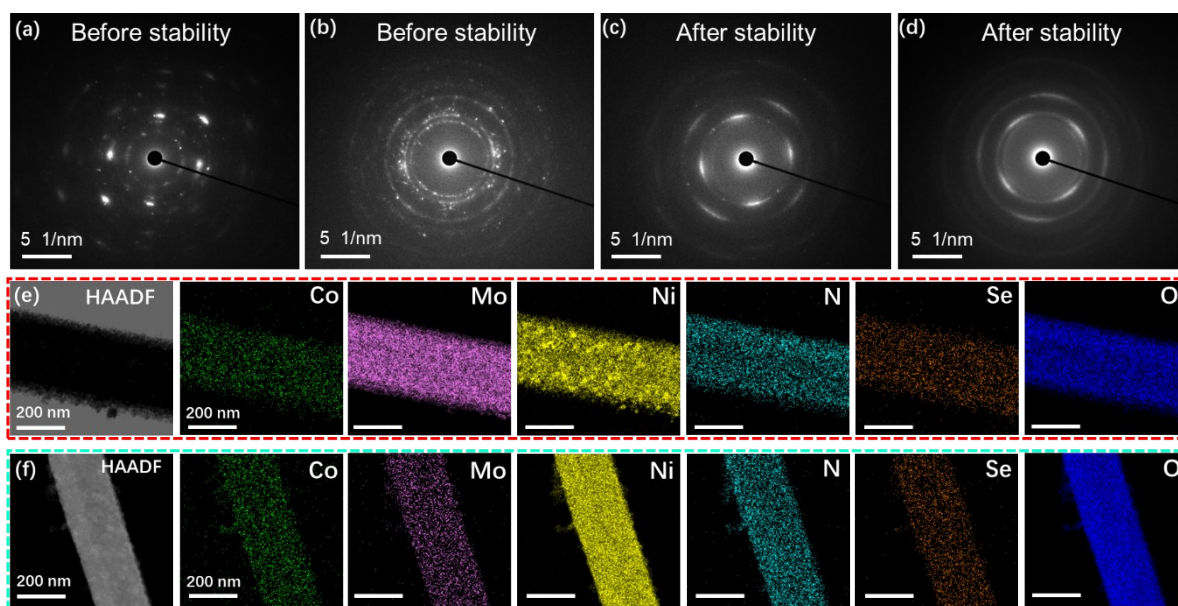

**Figure S22.** (a-b) SAED of N-NCM-Se before stability. (c-d) SAED of N-NCM-Se after stability and their corresponding HAADF/TEM elemental mapping (e) before and (f) after OER stability.

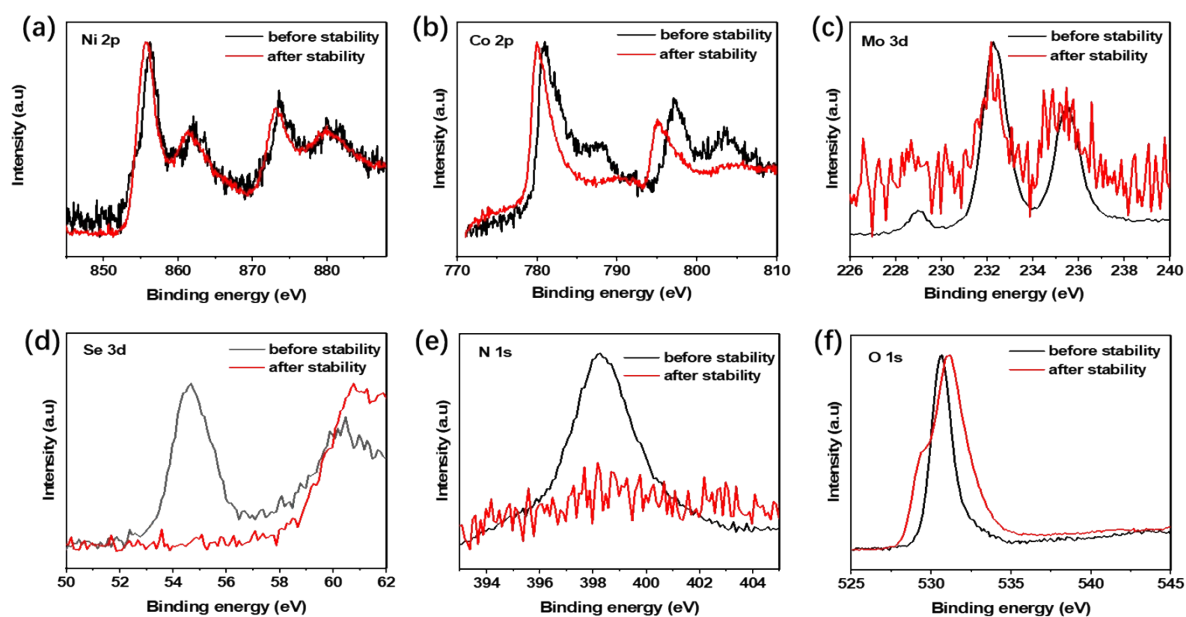

**Figure S23.** (a) Ni 2p, (b) Co 2p, (c) Mo 3d, (d) Se 3d, (e) N 1s, and (f) O 1s XPS spectra of N-NCM-Se before and after 60 h OER stability test.

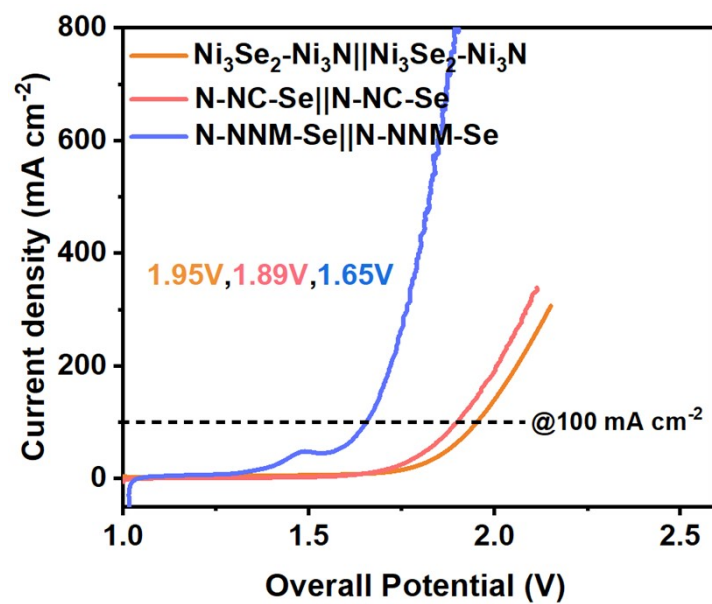

**Figure S24.** OVS LSV curves for Ni<sub>3</sub>Se<sub>2</sub>-Ni<sub>3</sub>N, N-NC-Se and N-NNM-Se electrodes using both cathode and anode.

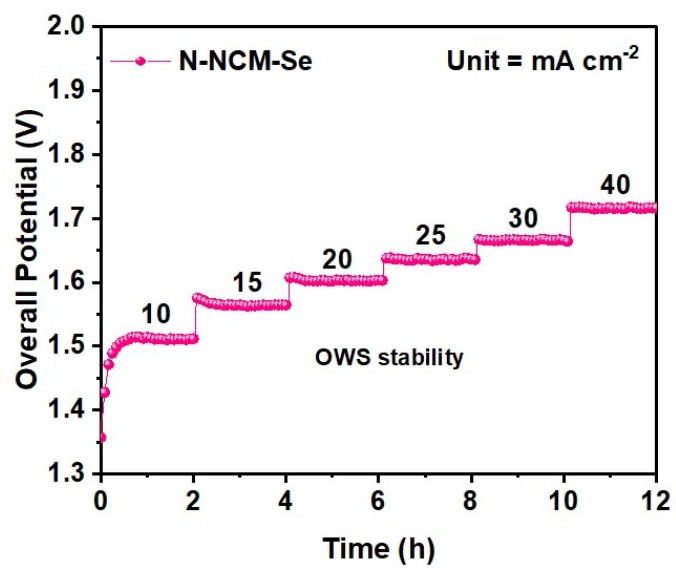

**Figure S25.** OWS stability of N-NCM-Se||N-NCM-Se for 12 h at different densities.

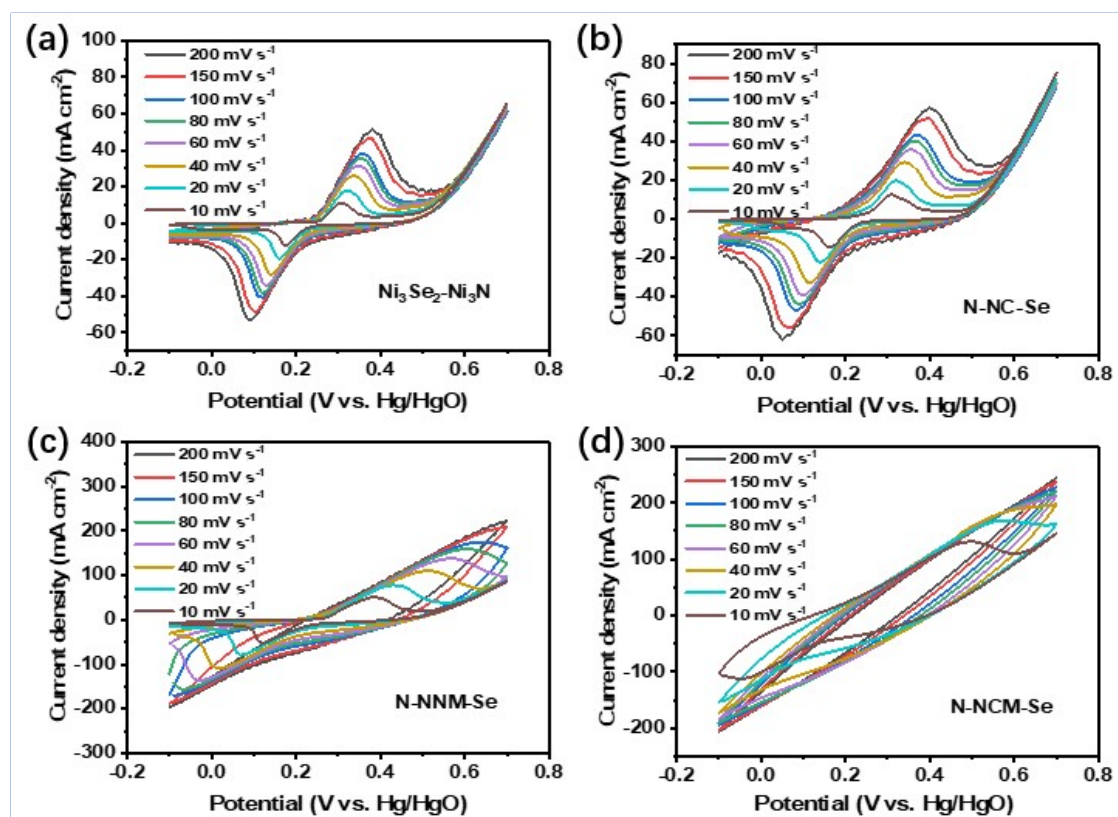

**Figure S26.** CV curves of (a) Ni<sub>3</sub>Se<sub>2</sub>-Ni<sub>3</sub>N, (b) N-NC-Se (c) N-NNM-Se and (d) N-NCM-Se at different scan rates for the SC three electrode system.

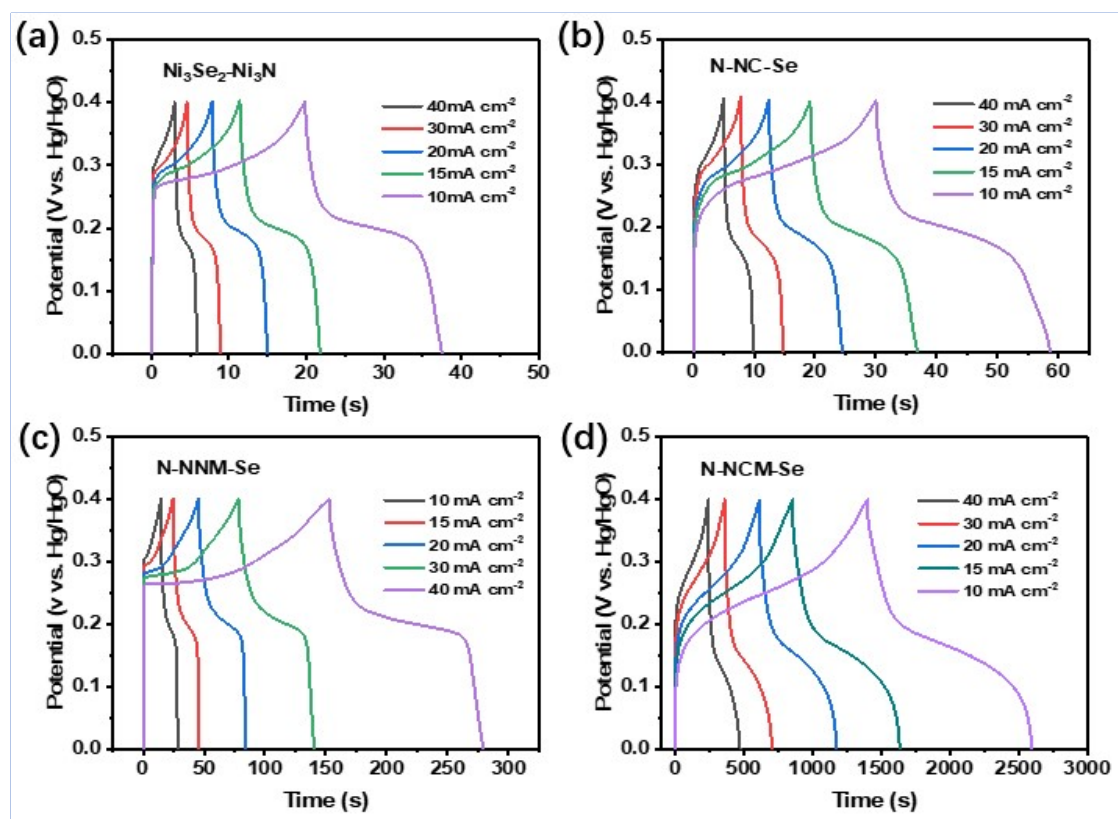

**Figure S27.** GCD curves of (a)  $\text{Ni}_3\text{Se}_2\text{-Ni}_3\text{N}$ , (b) N-NC-Se (c) N-NNM-Se and (d) N-NCM-Se at different current densities for the SC three electrode system.

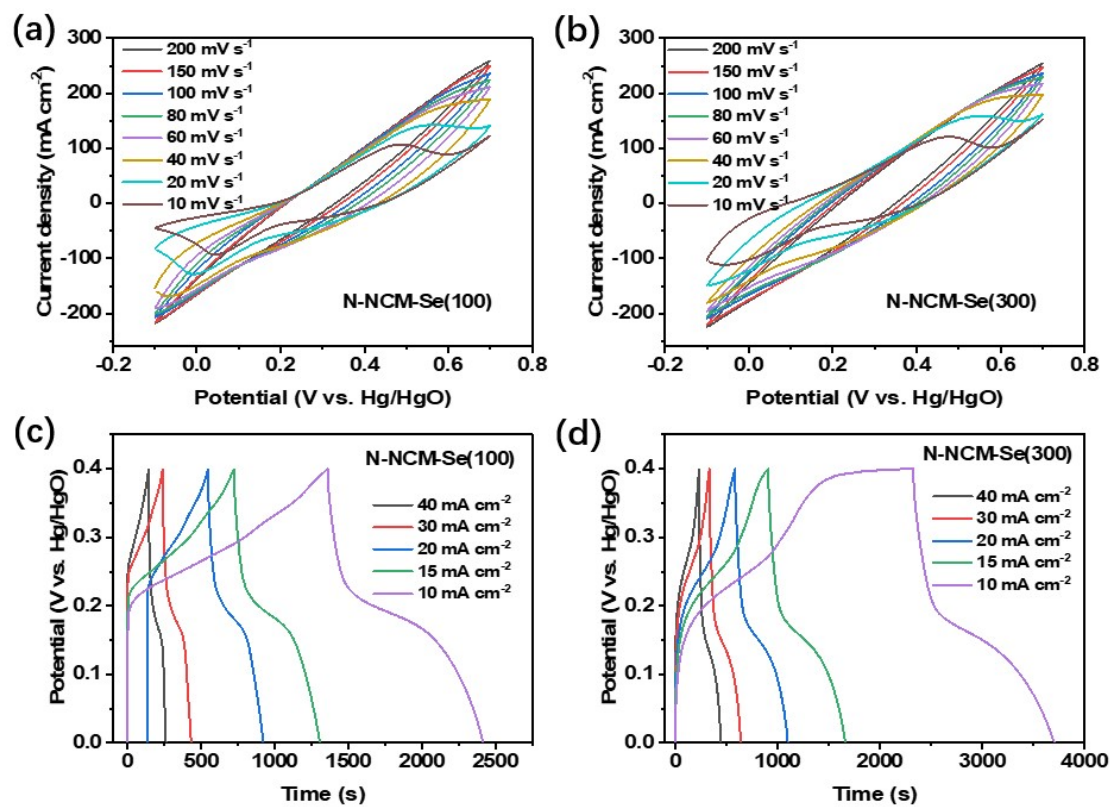

**Figure S28.** CV curves of (a) N-NCM-Se/100 and (b) N-NCM-Se/300 at different scan rates for the SC three electrode system. (c-d) GCD curves of (c) N-NCM-Se/100 and (d) N-NCM-Se/300 at different current densities for the SC three electrode system.

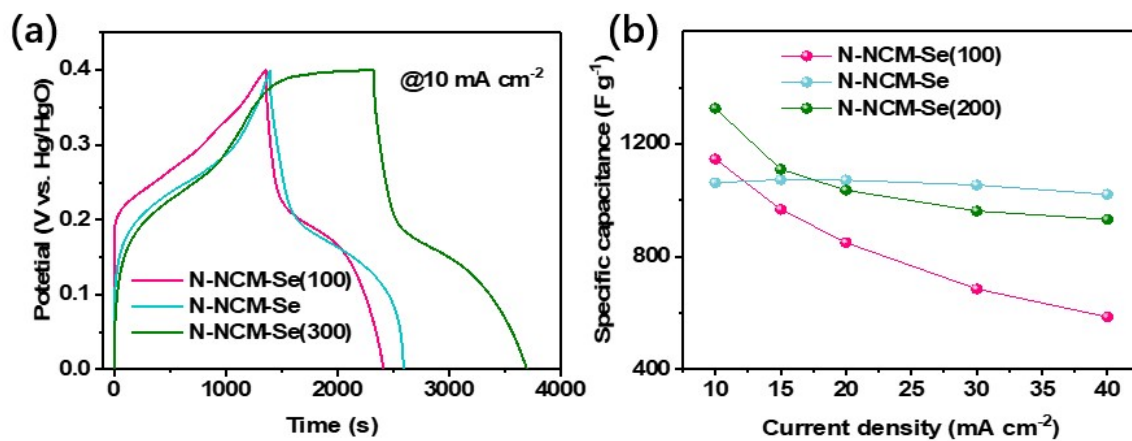

**Figure S29.** Comparisons of the (a) GCD curves at 10 mA cm<sup>-2</sup> and (b) specific capacitances of N-NCM-Se electrodes with different selenium concentrations.



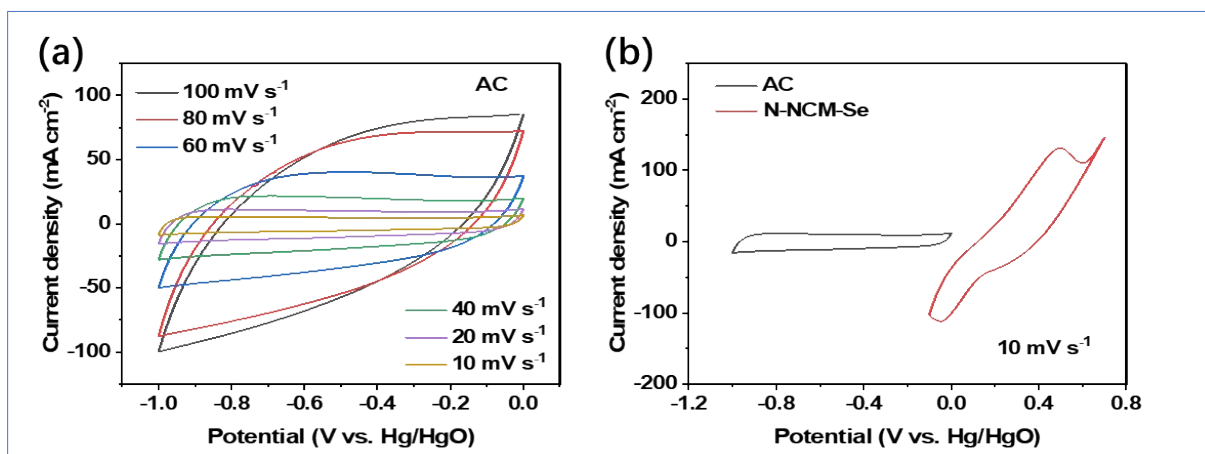

**Figure S30.** CV curves for (a) AC anode and (b) combined CVs of AC anode and N-NCM-Se cathode.

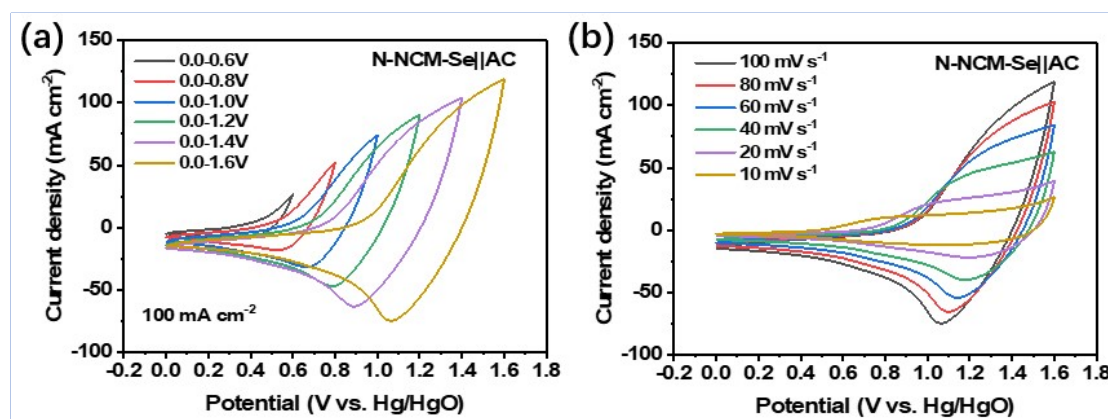

**Figure S31.** (a) CV curves of N-NCM-Se||AC ASC device using different electrochemical window at fixed scan rate of 100 mV s<sup>-1</sup>. (b) CV curves of N-NCM-Se||AC ASC device at wide potential window at different scan rates using fixed potential range of 0 - 1.6 V.

**Table S3.** N-NCM-Se||AC performance comparison with other recent reports on selenides-based electrode in ASC.

C = Specific capacitance; E= Energy density; and P= Power density

| Materials                                                           | Electrolyte  | C (F g <sup>-1</sup> )           | E (Wh kg <sup>-1</sup> ) | P (W kg <sup>-1</sup> ) | References                                   |
|---------------------------------------------------------------------|--------------|----------------------------------|--------------------------|-------------------------|----------------------------------------------|
| <b>M-Ni<sub>3</sub>Se<sub>2</sub>@CoSe    AC</b>                    | <b>3MKOH</b> | <b>206 @0.6 A g<sup>-1</sup></b> | <b>73</b>                | <b>1838</b>             | <b>Our work</b>                              |
| 3DG/ZnSe-SnSe <sub>2</sub>    AC                                    | 3MKOH        | 80.5 @1 A g <sup>-1</sup>        | 25.3                     | 750                     | ACS Appl. Nano Mater. 2024, 7, 13434–13446   |
| CoSe <sub>2</sub> @NiMn-LDH@Cu <sub>1.8</sub> Se    AC              | 6M KOH       | 102 @0.2A g <sup>-1</sup>        | 36.6                     | 760.2                   | J. Colloid Interface Sc, 655 (2024) 273-285  |
| 3DG/(Co,Ni)Se <sub>2</sub> CNWs    AC                               | 6M KOH       | 78.1 @ 1Ag <sup>-1</sup>         | 28                       | 800                     | Colloid Surf A: Phys. Eng, 698 (2024) 134595 |
| SnO <sub>2</sub> -SnSe    AC                                        | 3M KOH       | 93.8 @ 1Ag <sup>-1</sup>         | 33.4                     | 800.4                   | Nano Energy, 126 (2024) 109690               |
| Bi <sub>2</sub> Se <sub>3</sub>    NiCo <sub>2</sub> S <sub>4</sub> | 3M KOH       | 139 @ 0.5 A g <sup>-1</sup>      | 48                       | 800                     | J. Energy Storage,75, 2024, 109662           |
| NiCo <sub>2</sub> Se <sub>4</sub>    AC                             | 6M KOH       | 120 @ 2 A g <sup>-1</sup>        | 42.4                     | 1600                    | J. Alloys Compd 973 (2024) 172913            |
| MnCoSe <sub>2</sub>    rGO                                          | 1M KOH       | 71 @ 1A g <sup>-1</sup>          | 32                       | 227                     | Surf. Interfaces 42 (2023) 103358            |
| CoSe-Se@Ni    AC                                                    | 3.0 M KOH    | 106.73@0.5A g <sup>-1</sup>      | 37.94                    | 475.30                  | Ceramics International 47 (2021) 15293–15306 |
| V-(Ni,Co)Se <sub>2</sub> @Nb <sub>2</sub> CTx    AC                 | 6 M KOH      | 110.8 @ 2 A g <sup>-1</sup>      | 45.6                     | 168.4                   | J. Chem. Eng. 484 (2024) 149440              |
| CuCoSe@NiS/NF    AC                                                 | 3.0M KOH     | 117.4 @ 1 A g <sup>-1</sup>      | 41.8                     | 800                     | J. Mater. Chem. A, 2024,12, 13818-13829      |
